# Supplementary material for: Photoluminescence properties of BaSiF6:Eu3+,Eu3+/K+and Eu3+/Tb3+co-doped phosphors
Source: Royal Society of Chemistry journal article supplement (doi:10.1039/c5nj01857a), 2015-01-01
Supplement: c5nj01857a1.pdf [file c5nj01857a1.pdf]

## Electronic Supplementary Material (ESI) for New Journal of Chemistry.

This journal is © The Royal Society of Chemistry and the Centre National de la Recherche Scientifique 2015

### Photoluminescence properties of $\text{BaSiF}_6: \text{Eu}^{3+}$ , $\text{Eu}^{3+}/\text{K}^+$ and $\text{Eu}^{3+}/\text{Tb}^{3+}$ co-doped phosphors

Yuan Zhang,<sup>a</sup> Keke Huang,<sup>a</sup> Long Yuan,<sup>a</sup> Yanyan Du,<sup>b</sup> and Shouhua Feng<sup>a\*</sup>

<sup>a</sup>State Key Laboratory of Inorganic Synthesis and Preparative Chemistry, College of Chemistry, Jilin University, Changchun, 130012, P. R. China.

<sup>b</sup>Shanghai Institute of Ceramics, Chinese Academy of Sciences, 200050 Shanghai, P. R. China.

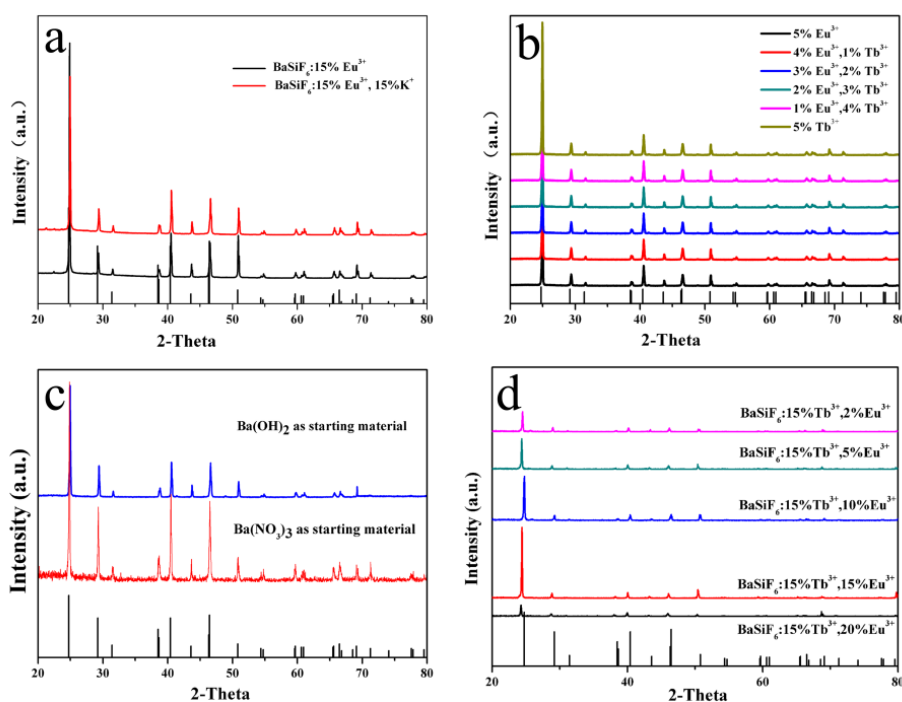

**Fig. S1** XRD patterns of (a)  $\text{BaSiF}_6: 15\% \text{Eu}^{3+}$  and  $\text{BaSiF}_6: 15\% \text{K}^+, 15\% \text{Eu}^{3+}$  phosphors; (b) and (d) A series of  $\text{Eu}^{3+}$  and  $\text{Tb}^{3+}$  co-doped  $\text{BaSiF}_6$ ; (c)  $\text{BaSiF}_6$  host material synthesized with different starting material; The black vertical lines at the bottom indicate the standard XRD pattern of  $\text{BaSiF}_6$  (JCPDS card number 15-0736).

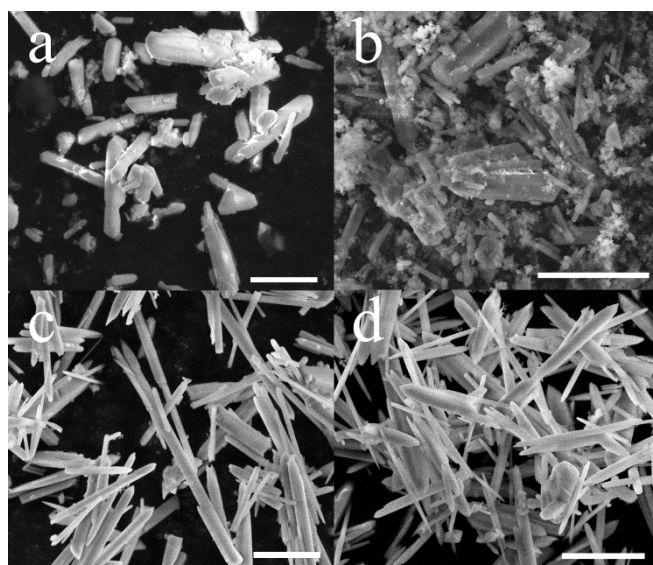

**Fig. S2** SEM images of (a)  $\text{BaSiF}_6: \text{K}^+, \text{Eu}^{3+}$  synthesized with  $\text{Ba}(\text{OH})_2$ ; (b)  $\text{BaSiF}_6: \text{Tb}^{3+}, \text{Eu}^{3+}$  synthesized with  $\text{Ba}(\text{OH})_2$ ; (c)  $\text{BaSiF}_6: \text{K}^+, \text{Eu}^{3+}$  synthesized with  $\text{Ba}(\text{NO}_3)_3$ ; (d)  $\text{BaSiF}_6: \text{Tb}^{3+}, \text{Eu}^{3+}$  synthesized with  $\text{Ba}(\text{NO}_3)_3$ . All the scale bars are  $5 \mu\text{m}$ .

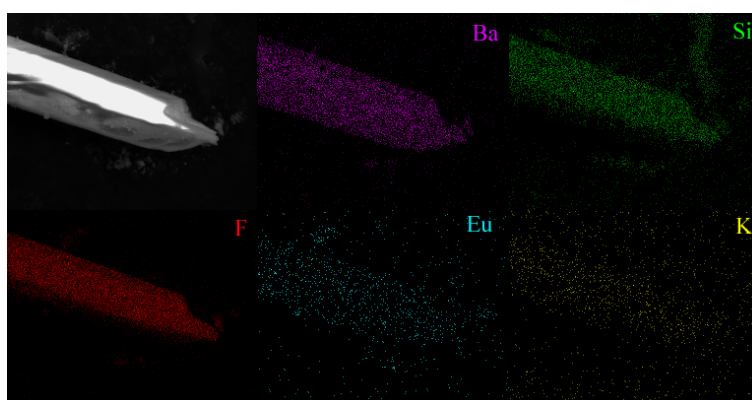

**Fig. S3** SEM mapping of  $\text{BaSiF}_6: 15\%\text{Eu}^{3+}, 15\%\text{K}^+$  phosphors.

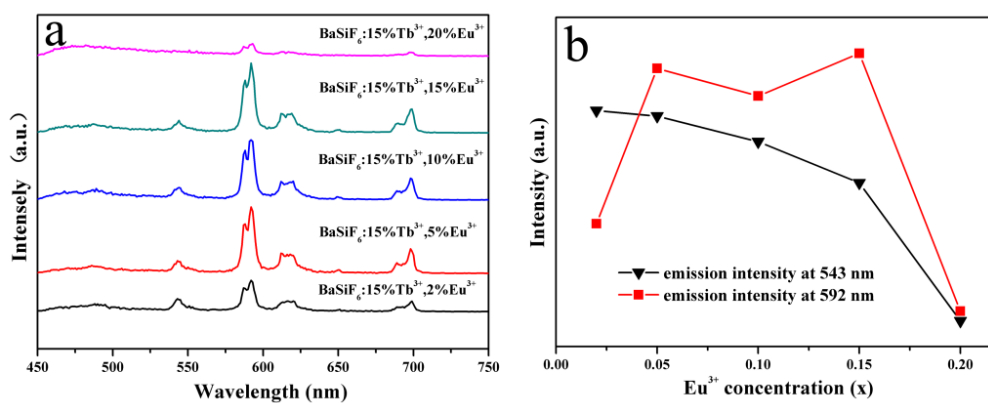

**Fig. S4** (a) Emission spectra [ex=351 nm] of samples  $\text{BaSiF}_6: 15\%\text{Tb}^{3+}, x\text{Eu}^{3+}$  ( $x=2\%, 5\%, 10\%, 15\%, 20\%$ ) at room temperature; (b) Emission intensities of  $\text{Tb}^{3+}$  (black triangle) at 543 nm and  $\text{Eu}^{3+}$  (red block) at 592 nm as a function of the  $\text{Eu}^{3+}$  doping concentration in  $\text{BaSiF}_6$ .

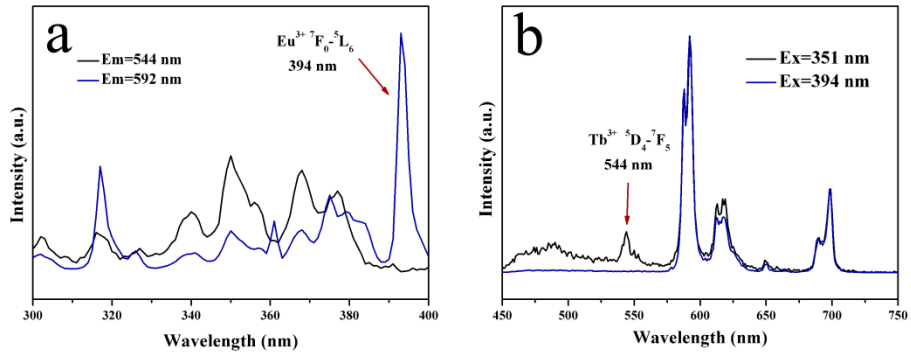

**Fig. S5** (a) Excitation [black, em=544 nm; blue, em=592 nm] and (b) emission [black, ex=351 nm; blue, ex=394 nm] spectra of sample BaSiF<sub>6</sub>:15%Tb<sup>3+</sup>, 15%Eu<sup>3+</sup> at room temperature.

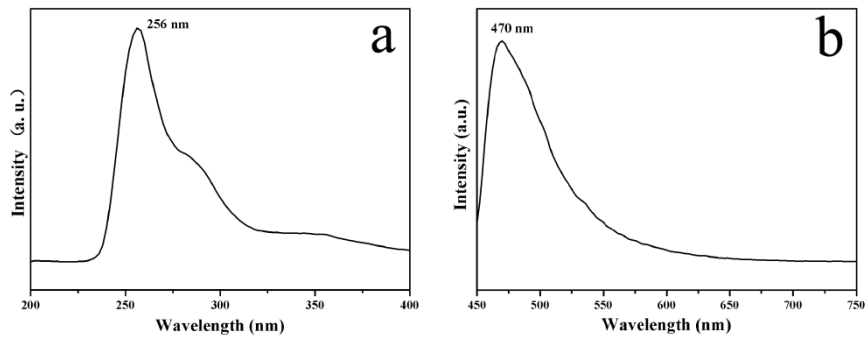

**Fig. S6** PL excitation and emission spectra of BaSiF<sub>6</sub> host materials.

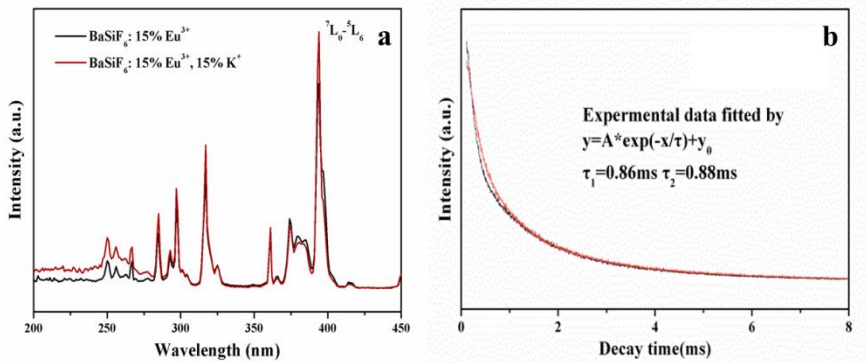

**Fig. S7** PL excitation spectra (a) and decay patterns (b) of BaSiF<sub>6</sub>: 15%Eu<sup>3+</sup> and BaSiF<sub>6</sub>: 15%Eu<sup>3+</sup>, 15%K<sup>+</sup>.

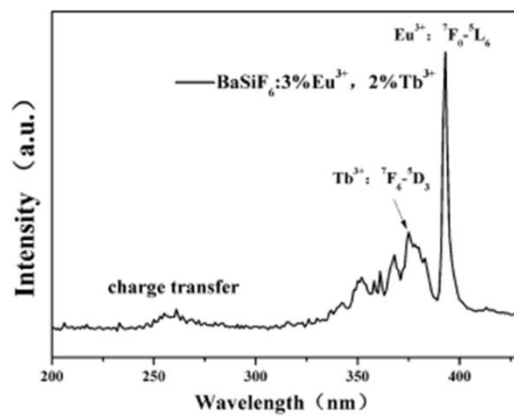

**Fig. S8** PL excitation spectrum of BaSiF<sub>6</sub>:3%Eu<sup>3+</sup>, 2%Tb<sup>3+</sup> under 592 nm monitored.
